# Supplementary material
Source: PubMed Central journal article supplement (PMC4879300)
Supplement: JCM.03259-15_zjm999094997so1.pdf [file JCM.03259-15_zjm999094997so1.pdf]

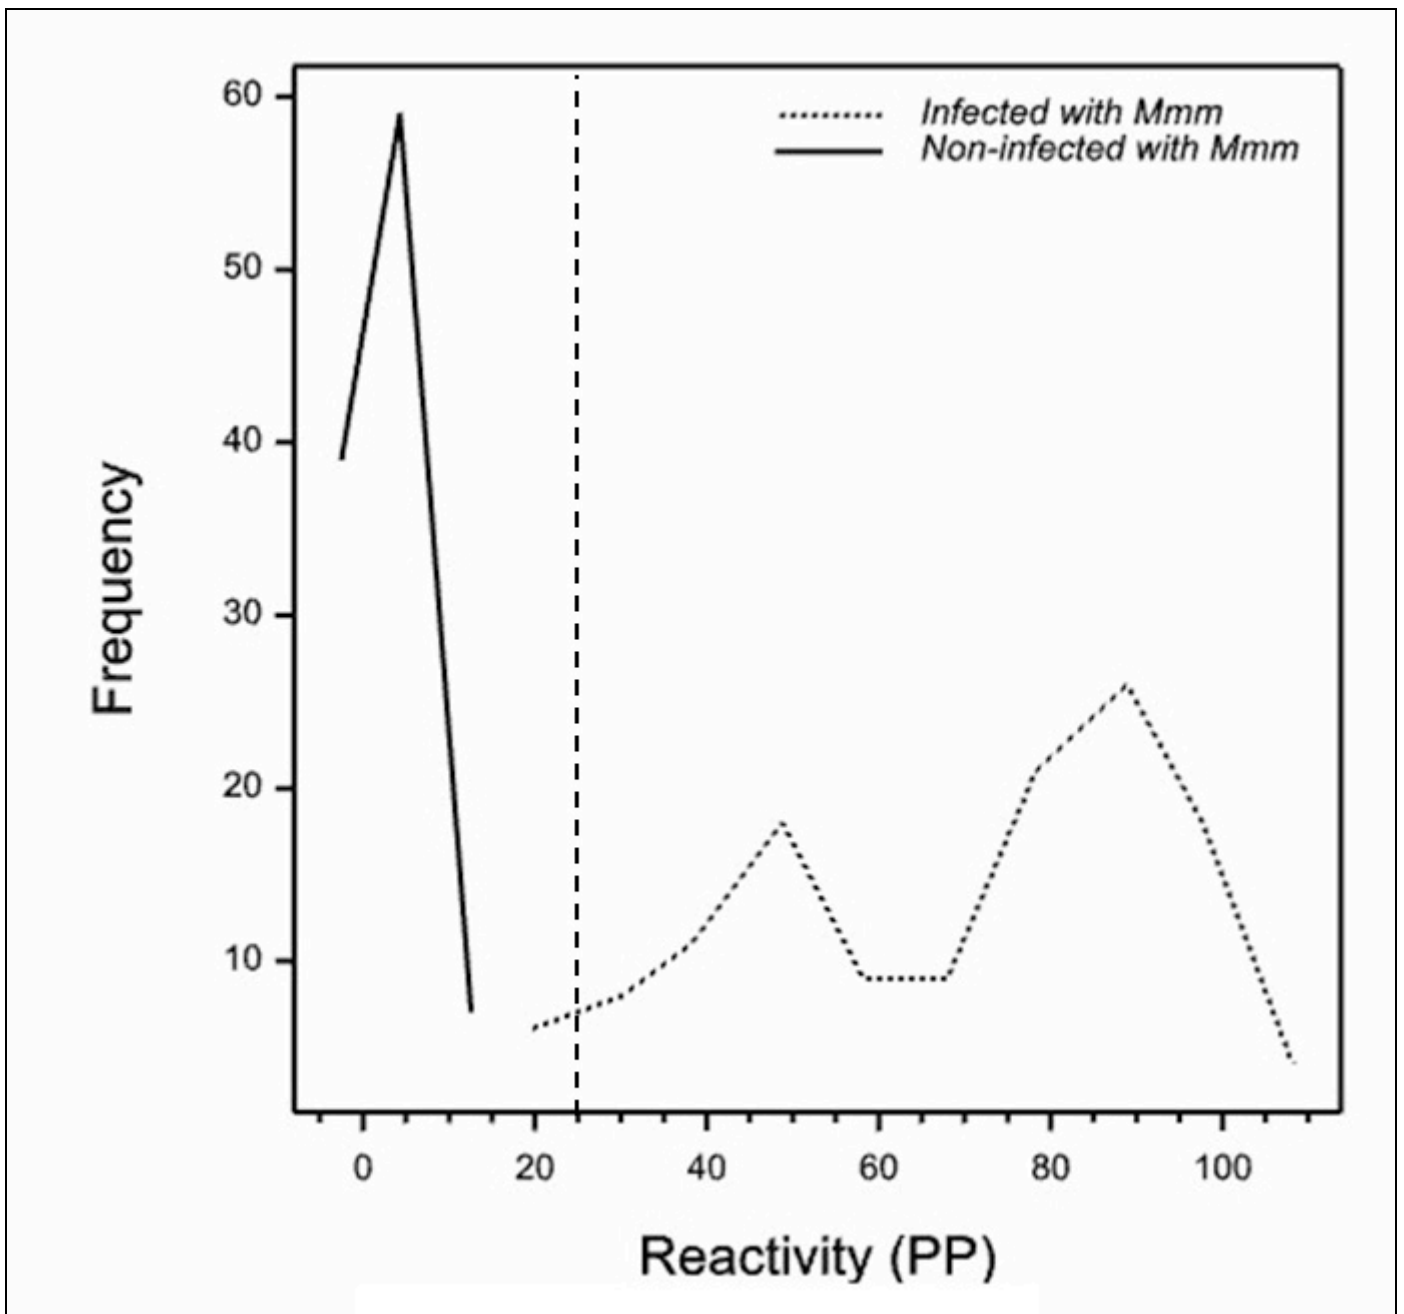

**FIGURE S1** Frequency distribution graph displaying the normalized data (PP values) for all recombinant protein combinations tested against sera belonging to panel B. Dotted line; 25% cut off.



|                          |             |   |             |             |   |             |             |   |   |   |   |   |   |             |             |   |             |
|--------------------------|-------------|---|-------------|-------------|---|-------------|-------------|---|---|---|---|---|---|-------------|-------------|---|-------------|
| MSC_0813                 | -           | - | <b>pos.</b> | <b>pos.</b> | - | <b>pos.</b> | -           | - | - | - | - | - | - | <b>pos.</b> | -           | - | <b>pos.</b> |
| MSC_0816                 | -           | - | <b>pos.</b> | <b>pos.</b> | - | -           | -           | - | - | - | - | - | - | -           | <b>pos.</b> | - | -           |
| MSC_1046<br>(N-terminal) | <b>pos.</b> | - | -           | -           | - | <b>pos.</b> | <b>pos.</b> | - | - | - | - | - | - | -           | -           | - | -           |

n.d., not determined

pos., positive result

- , negative result
